# Supplementary material
Source: PubMed Central journal article supplement (PMC2721641)

### **Supplement Data 1. Echocardiogram**

M-mode echocardiogram was obtained from left ventricular short-axis view on day 7 after reperfusion. (A) A representative echocardiogram of a normal rat heart as a baseline. (B) A representative echocardiogram of a vehicle-treated rat after 7 days of reperfusion. (C) A representative M-mode echocardiogram of an EP4RAG-treated (3mg/kg) after 7 days of reperfusion. Note that %FS of the EP4RAG-treated groups was improved compared to the vehicle-treated groups.

*Supplement Data 1*

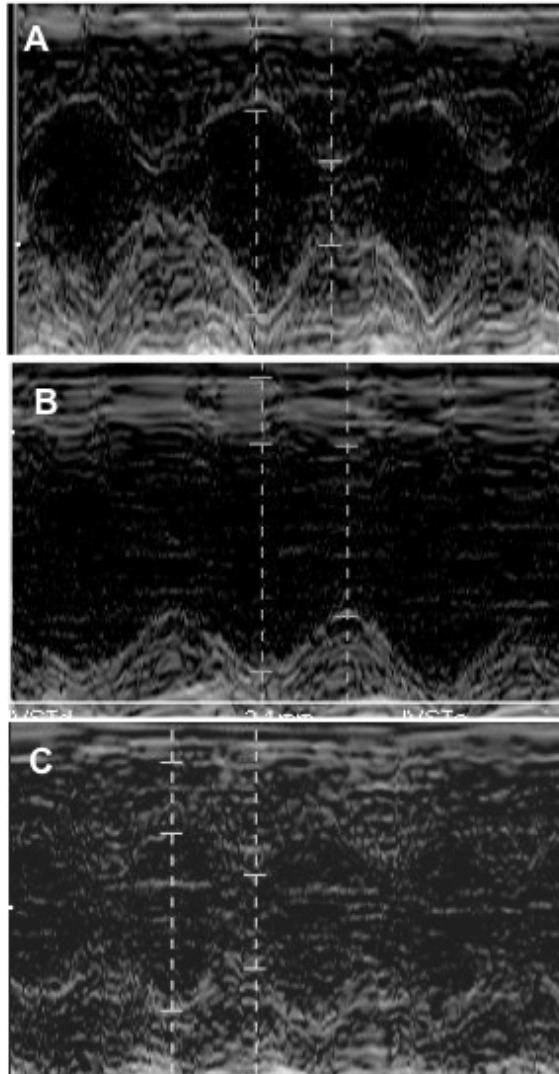

## **Supplement Data 2. EP4 staining**

Immunohistochemical analysis with anti-EP4 antibody in the native heart without EP4RAG treatment (A), the I/R heart without EP4RAG treatment (B), and the I/R heart with EP4RAG treatment (C). The EP4 receptor was barely detectable in the LV obtained from native mice. Expression of EP4 receptor in I/R hearts without EP4RAG on day 7 was enhanced in AAR in LV. EP4RAG did not increase EP4R expression in EP4RAG-treated IR hearts in comparison to that in non-treated IR hearts. Scale bars: 50 $\mu$ m

Supplement Data 2

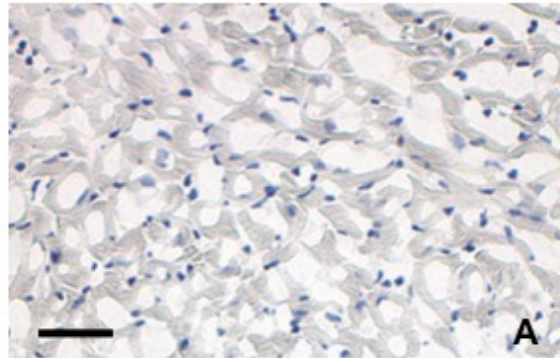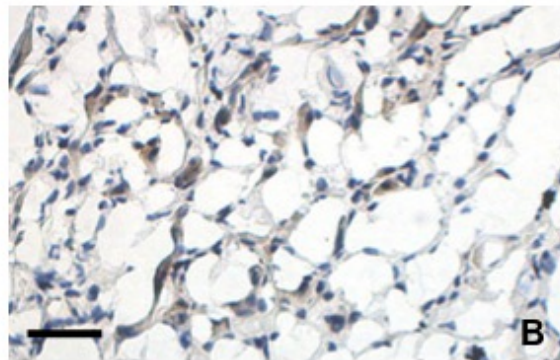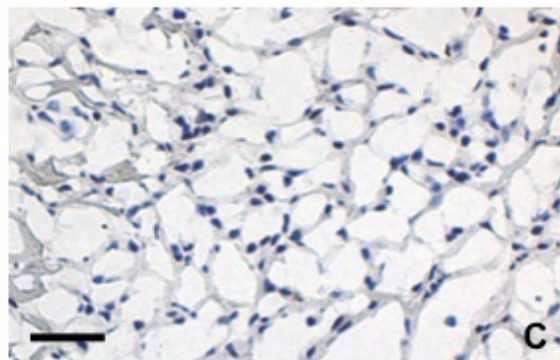

Supplement: cvn254_1.pdf [file cvn254_1.pdf]
